# Supplementary material
Source: PubMed Central journal article supplement (PMC4206155)
Supplement: supp_WNL.0000000000000892_Figure_e-1.pdf [file supp_WNL.0000000000000892_Figure_e-1.pdf]

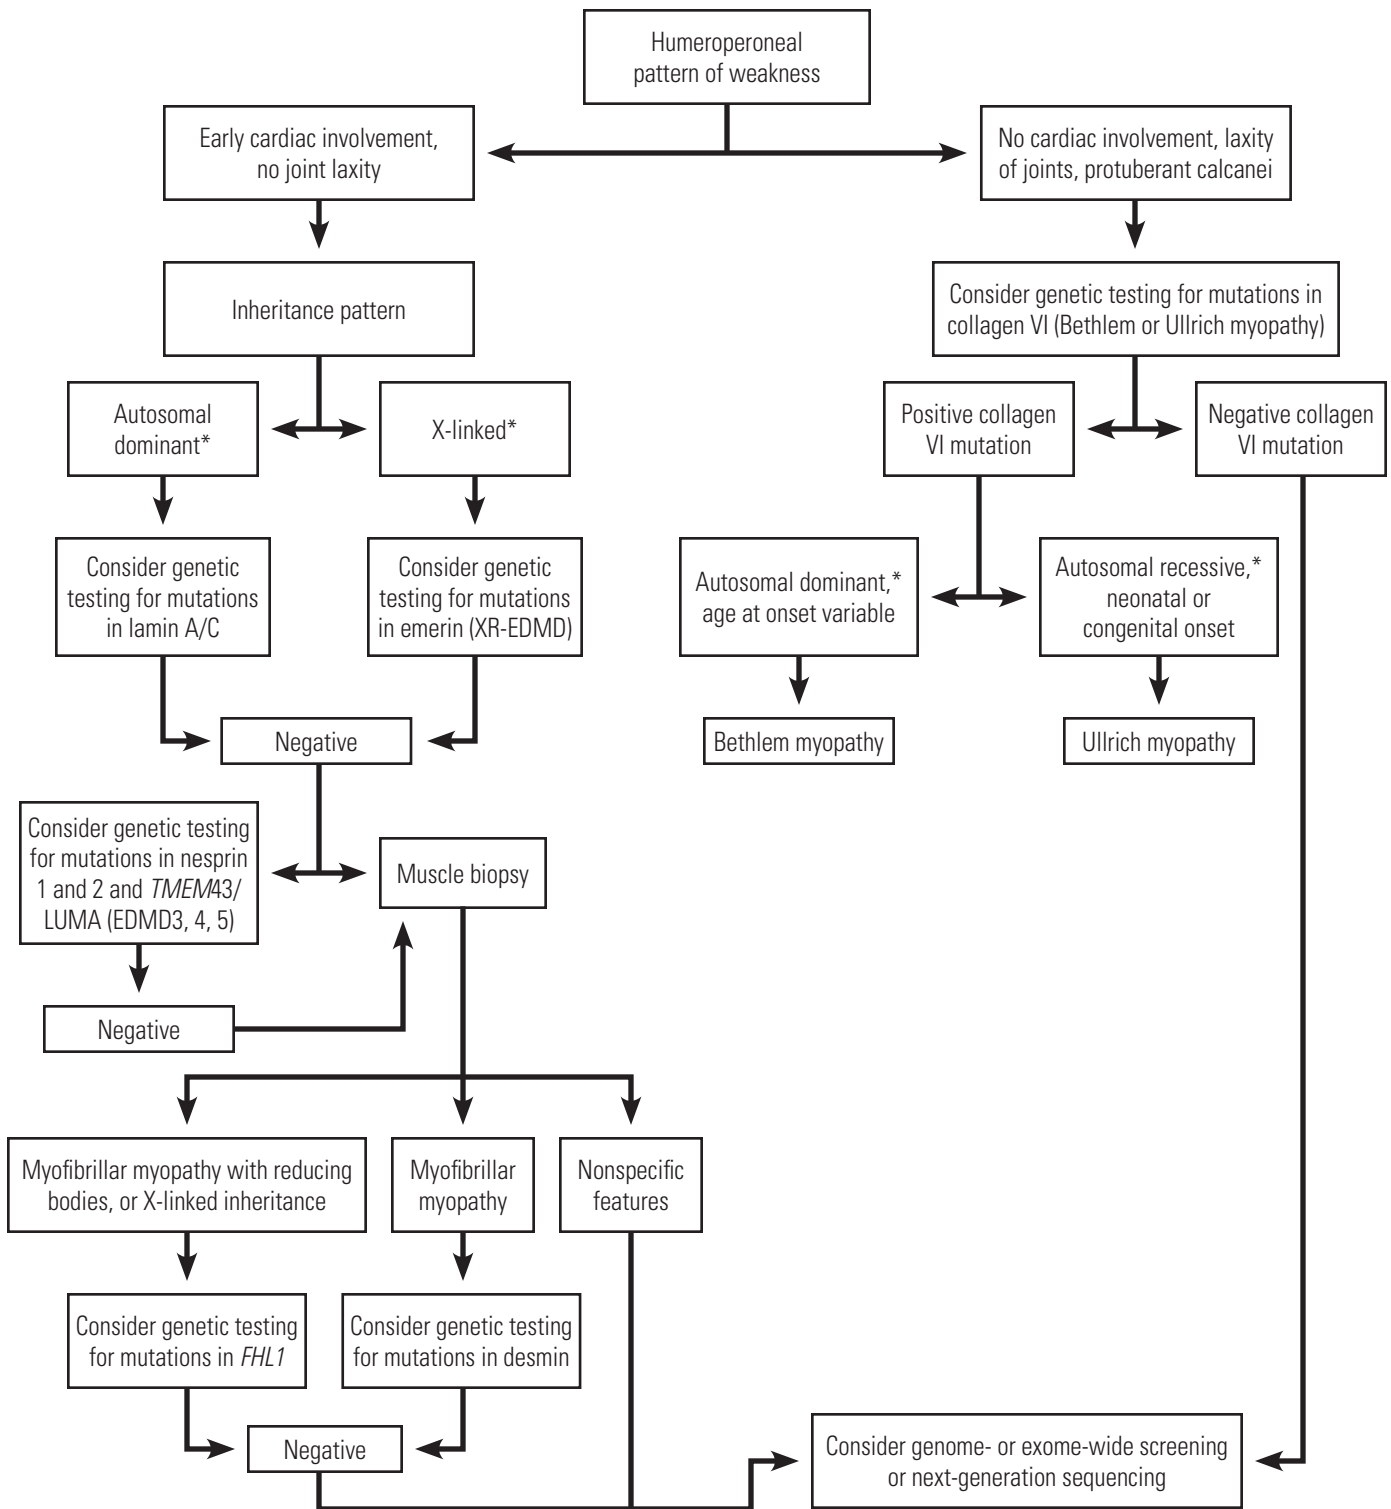

**Figure e-1. Diagnostic approach to patients with a humeroperoneal pattern of weakness and suspected muscular dystrophy (Emery-Dreifuss muscular dystrophy)**

\* Autosomal dominant, autosomal recessive, or X-linked inheritance may be responsible in sporadic cases. EDMD = Emery-Dreifuss muscular dystrophy.
