# Supplementary material
Source: PubMed Central journal article supplement (PMC4206155)
Supplement: supp_WNL.0000000000000892_Figure_e-2.pdf [file supp_WNL.0000000000000892_Figure_e-2.pdf]

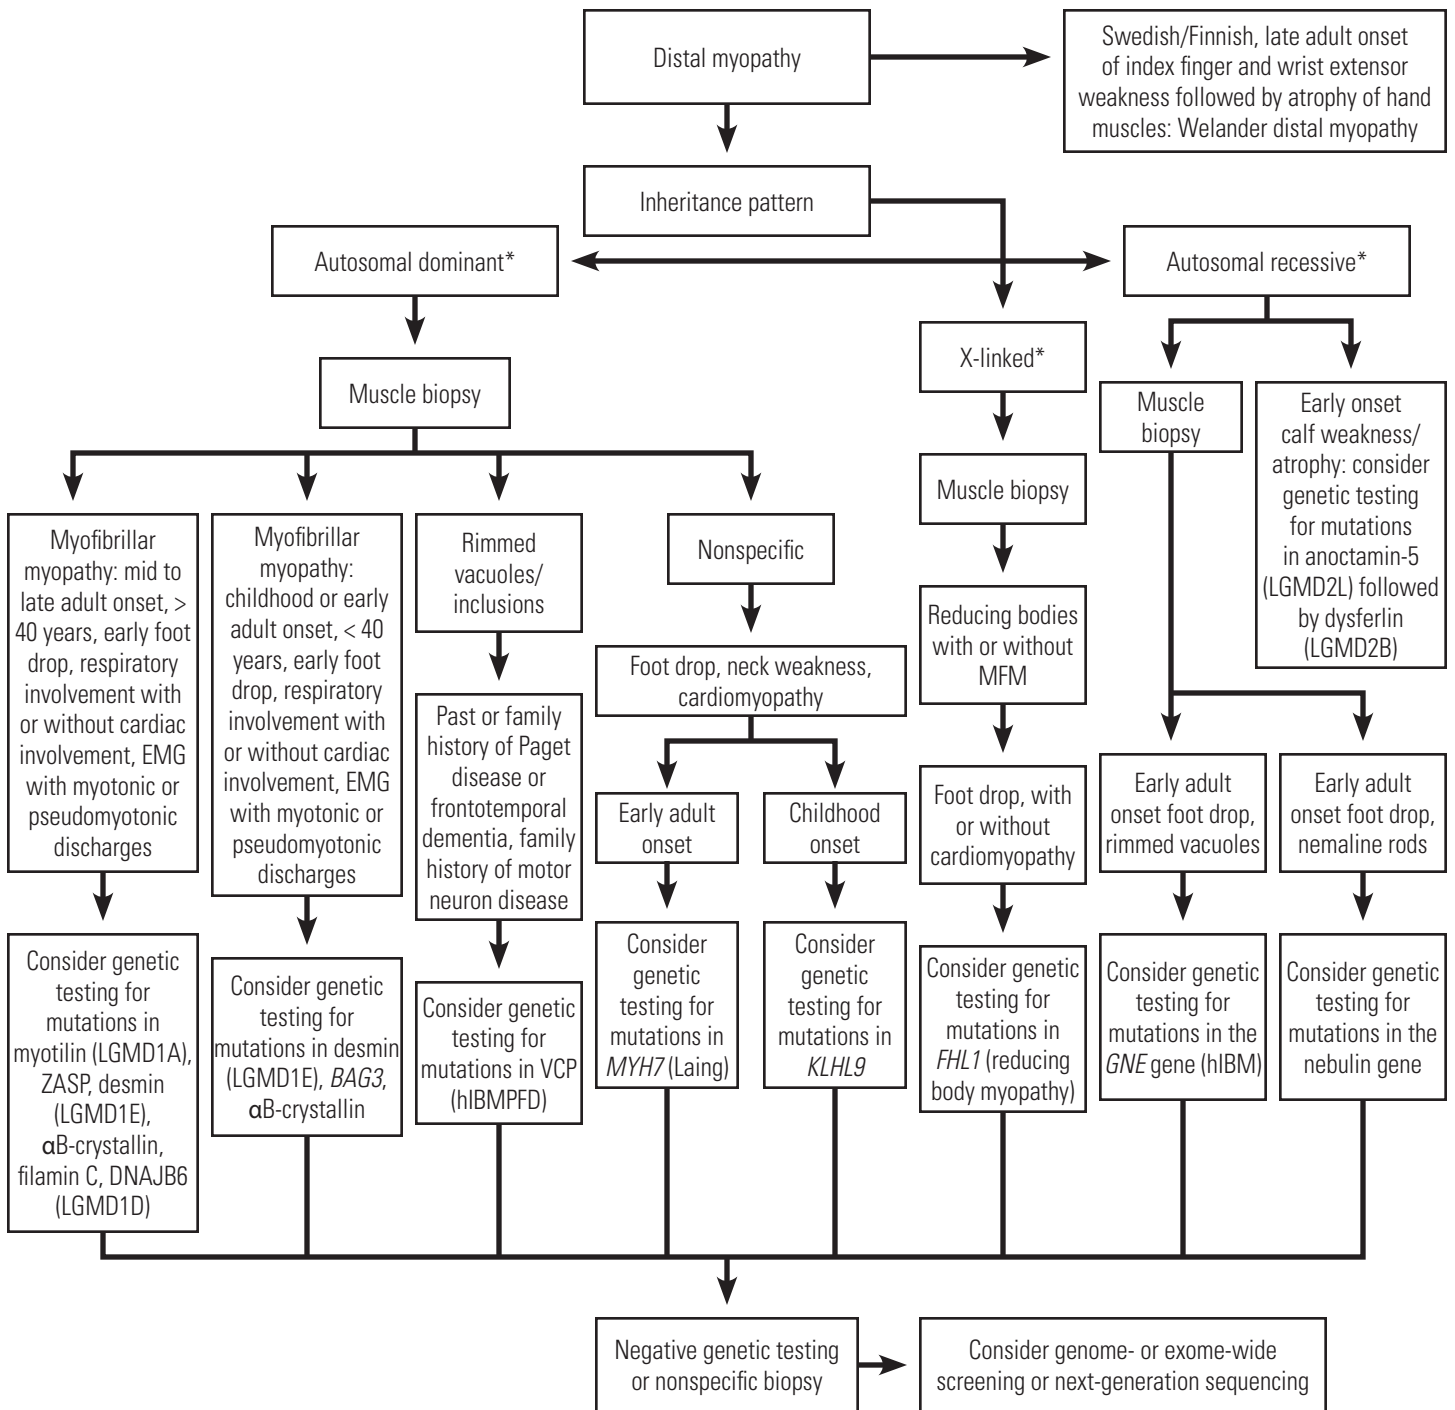

**Figure e-2. Diagnostic approach to patients with a distal pattern of weakness and suspected muscular dystrophy**

\* Autosomal dominant, autosomal recessive, or X-linked inheritance may be responsible in sporadic cases.

hIBM = hereditary inclusion body myopathy; hBMPFD = hereditary inclusion body myopathy with Paget disease and frontotemporal dementia; LGMD = limb-girdle muscular dystrophy; MFM = myofibrillar myopathy; VCP = valosin-containing protein.
