# Supplementary material
Source: PubMed Central journal article supplement (PMC4206155)
Supplement: supp_WNL.0000000000000892_Table_e-2.pdf [file supp_WNL.0000000000000892_Table_e-2.pdf]

**Table e-2. Distinguishing features of muscular dystrophies**

| <b>Designation</b>                              | <b>Protein</b> | <b>Chromosome</b> | <b>Inheritance</b> | <b>Common patterns of weakness</b> | <b>Distinguishing clinical features</b>                                   | <b>Distinguishing EMG and muscle biopsy features</b>                      | <b>Complications</b>                                              |
|-------------------------------------------------|----------------|-------------------|--------------------|------------------------------------|---------------------------------------------------------------------------|---------------------------------------------------------------------------|-------------------------------------------------------------------|
| <b>X-linked muscular dystrophies</b>            |                |                   |                    |                                    |                                                                           |                                                                           |                                                                   |
| EDMD-X1                                         | Emerin         | Xq28              | XR                 | HP                                 | Contractures invariably present early in the disease course               |                                                                           | Cardiac conduction abnormalities                                  |
| EDMD-X2                                         | FHL1           | Xq27.2            | XR                 | LG, HP or SP, DM                   | Foot drop; extremity contractures and neck contractures common            | Myofibrillar myopathy or reducing bodies                                  | Severe respiratory failure in many patients                       |
| Becker muscular dystrophy                       | Dystrophin     | Xp21              | XR                 | LG                                 | Calf hypertrophy                                                          | Mosaic appearance of dystrophin on immunohistochemistry in affected woman | Dilated cardiomyopathy in 4% to 70% depending on disease duration |
| <b>Limb-girdle muscular dystrophies (LGMDs)</b> |                |                   |                    |                                    |                                                                           |                                                                           |                                                                   |
| LGMD1A                                          | Myotilin       | 5q22.3-31.3       | AD                 | LG, DM                             | Onset > 40 years, foot drop, asymmetric muscle weakness and atrophy       | Myofibrillar myopathy, myotonic or pseudomyotonic discharges              | Cardiomyopathy, respiratory muscle weakness                       |
| LGMD1B                                          | Lamin A/C      | 1q11-21           | AD                 | LG, HP, DM                         | Early humeroperoneal weakness, limb contractures                          |                                                                           | Cardiomyopathy and conduction system disease                      |
| LGMD1C                                          | Caveolin-3     | 3p25              | AD                 | LG                                 | Rippling muscles, percussion-induced rapid contractions, prominent muscle |                                                                           |                                                                   |

|        |                       |              |    |                            |                                                                                                                                          |                                                                               |                                                                                     |
|--------|-----------------------|--------------|----|----------------------------|------------------------------------------------------------------------------------------------------------------------------------------|-------------------------------------------------------------------------------|-------------------------------------------------------------------------------------|
|        |                       |              |    |                            | cramps and calf hypertrophy                                                                                                              |                                                                               |                                                                                     |
| LGMD1D | DNAJB6                | 6q23         | AD | LG, DM                     | Onset > 40 years, foot drop                                                                                                              | Myofibrillar myopathy, rimmed vacuoles, myotonic or pseudomyotonic discharges |                                                                                     |
| LGMD1E | Desmin                | 2q35         | AD | LG, HP, DM                 | Onset < 40 years, foot drop                                                                                                              | Myofibrillar myopathy, myotonic or pseudomyotonic discharges                  | Cardiomyopathy, respiratory muscle weakness                                         |
| LGMD2A | Calpain-3             | 15q15.1-21.1 | AR | LG                         | More common in patients with British, Southern or Eastern European, or Brazilian ancestry; scapular winging, absence of calf hypertrophy | Inflammatory changes on some biopsies                                         |                                                                                     |
| LGMD2B | Dysferlin             | 2p13         | AR | LG, DM (Miyoshi phenotype) | Calf atrophy, inability to stand on toes                                                                                                 |                                                                               | Left ventricular hypertrophy or reduced ejection fraction in rare patients          |
| LGMD2C | $\gamma$ -Sarcoglycan | 13q12        | AR | LG                         | Age of onset 2-23 years; macroglossia, ankle contractures, and scoliosis                                                                 |                                                                               | Severe ventilatory muscle weakness has been reported in up to one-third of patients |
| LGMD2D | $\alpha$ -Sarcoglycan | 17q12-21.3   | AR | LG                         |                                                                                                                                          |                                                                               |                                                                                     |

|                  |                                |          |    |                            |                                                                                                     |                                                              |
|------------------|--------------------------------|----------|----|----------------------------|-----------------------------------------------------------------------------------------------------|--------------------------------------------------------------|
| LGMD2E           | $\beta$ -Sarcoglycan           | 4q12     | AR | LG                         |                                                                                                     |                                                              |
| LGMD2F           | $\delta$ -Sarcoglycan          | 5q33-34  | AR | LG                         | Early age of onset, 4 to 10 years                                                                   | Early respiratory muscle involvement                         |
| LGMD2G           | Telethonin                     | 17q11-12 | AR | LG                         |                                                                                                     | Rimmed vacuoles<br>Cardiac involvement, type unspecified     |
| LGMD2H           | E3-ubiquitin-ligase (TRIM32)   | 9q31-33  | AR |                            | Hutterite descent                                                                                   | Many small vacuoles usually more prominent in type II fibers |
| LGMD2I           | Fukutin-related protein (FKRP) | 19q13    | AR | LG                         | Northern European ancestry, scapular winging, calf hypertrophy, early cardiorespiratory involvement | Dilated cardiomyopathy and respiratory dysfunction common    |
| LGMD2J           | Titin                          | 2q31     | AR | LG                         | Finnish and French populations                                                                      | Rimmed vacuoles                                              |
| LGMD2K           | POMT1                          | 9q31     | AR | LG                         |                                                                                                     |                                                              |
| LGMD2L           | Anoctamin-5                    | 11p14.3  | AR | LG, DM (Miyoshi phenotype) | Calf atrophy, inability to stand on toes                                                            |                                                              |
| LGMD2M (fukutin) | Fukutin                        | 9q31-33  | AR |                            | Early age of onset, 4 months to 4 years                                                             | Some muscle biopsies with prominent inflammatory changes     |
| LGMD2N           | POMT2                          | 14q24    | AR | LG                         |                                                                                                     |                                                              |
| LGMD2O           | POMGNT1                        | 1p32     | AR | LG                         |                                                                                                     |                                                              |
| LGMD2P           | $\alpha$ -Dystroglycan         | 3p21     | AR | LG                         |                                                                                                     |                                                              |

|        |         |        |    |    |                                                                                                                  |
|--------|---------|--------|----|----|------------------------------------------------------------------------------------------------------------------|
| LGMD2Q | Plectin | 8q24.3 | AR | LG | History of epidermolysis bullosa; pyloric atresia seen in other forms of plectinopathies, although not in LGMD2Q |
|--------|---------|--------|----|----|------------------------------------------------------------------------------------------------------------------|

---

**Myofibrillar myopathies**

|                                      |                              |               |    |            |                                                                     |                                                              |                                               |
|--------------------------------------|------------------------------|---------------|----|------------|---------------------------------------------------------------------|--------------------------------------------------------------|-----------------------------------------------|
| Myotilinopathy (LGMD1A)              | Myotilin                     | 5q22.3-31.3   | AD | LG, DM     | Onset > 40 years, foot drop, asymmetric muscle weakness and atrophy | Myofibrillar myopathy, myotonic or pseudomyotonic discharges | Cardiomyopathy, respiratory muscle weakness   |
| Desminopathy (LGMD1E)                | Desmin                       | 2q35          | AD | LG, HP, DM | Onset < 40 years, foot drop                                         | Myofibrillar myopathy, myotonic or pseudomyotonic discharges | Cardiomyopathy, respiratory muscle weakness   |
| Titinopathy (HMERF)                  | Titin                        | 2q31          | AD | LG         | Finnish and French populations                                      | Rimmed vacuoles, myofibrillar myopathy                       | Autosomal dominant, early respiratory failure |
| BAG3                                 | BCL2-associated athanogene 3 | 10q25.2-q26.2 | AD | LG, DM     | Onset < 40 years, foot drop                                         | Myofibrillar myopathy, myotonic or pseudomyotonic discharges | Cardiomyopathy, respiratory muscle weakness   |
| Filamin C (Williams distal myopathy) | Filamin C                    | 7q32.1        | AD | LG, DM     | Onset > 40 years, foot drop                                         | Myofibrillar myopathy, myotonic or pseudomyotonic discharges | Cardiomyopathy, respiratory muscle weakness   |
| $\alpha$ B-Crystallin                | $\alpha$ B-Crystallin        | 11q21-23      | AD | LG, DM     | Early or late onset, foot drop                                      | Myofibrillar myopathy, myotonic or pseudomyotonic            | Cardiomyopathy, respiratory muscle weakness   |

|                                                  |                                                                         |              |          |                  |                                                                                                                      |                                                              |                                             |
|--------------------------------------------------|-------------------------------------------------------------------------|--------------|----------|------------------|----------------------------------------------------------------------------------------------------------------------|--------------------------------------------------------------|---------------------------------------------|
|                                                  |                                                                         |              |          |                  |                                                                                                                      | discharges                                                   |                                             |
| ZASP                                             | Z-band alternatively spliced PDZ motif-containing protein               | 10q22.3-23.2 | AD       | LG, DM           | Onset > 40 years, foot drop                                                                                          | Myofibrillar myopathy, myotonic or pseudomyotonic discharges | Cardiomyopathy, respiratory muscle weakness |
| FHL1                                             | Four-and-one-half LIM1 protein                                          | Xq27.2       | X-linked | LG, HP or SP, DM | Foot drop; extremity contractures and neck contractures common                                                       | Myofibrillar myopathy or reducing bodies                     | Severe respiratory failure in many patients |
| <b>Hereditary inclusion body myopathy (hIBM)</b> |                                                                         |              |          |                  |                                                                                                                      |                                                              |                                             |
| AR hIBM                                          | Glucosamine (UDP-N-acetyl)-2-epimerase/N-acetylmannosamine kinase (GNE) |              | AR       | DM               | Early adult onset, foot drop                                                                                         | Rimmed vacuoles                                              |                                             |
| AD hIBMPFD                                       | Valosin-containing protein (VCP)                                        |              | AD       | LG, DM           | Proximal and distal weakness; past or family history of frontotemporal dementia, Paget disease, motor neuron disease | Rimmed vacuoles, myotonic discharges                         |                                             |
| hIBM3                                            | MYHC-IIA                                                                |              | AD       | LG               | External ophthalmoplegia, joint contractures                                                                         | Rimmed vacuoles, lobulated fibers, absent type IIA fibers    |                                             |
| <b>Distal dystrophies/myopathies</b>             |                                                                         |              |          |                  |                                                                                                                      |                                                              |                                             |
| Welander distal myopathy                         | TIA1                                                                    | 2p13         | AD       | DM               | Swedish/Finnish ancestry, late adult onset, index finger and wrist extensor weakness followed                        |                                                              |                                             |

|                                                                 |                                                                  |              |        |        |                                                                                                 |                                                              |                                                                                |
|-----------------------------------------------------------------|------------------------------------------------------------------|--------------|--------|--------|-------------------------------------------------------------------------------------------------|--------------------------------------------------------------|--------------------------------------------------------------------------------|
|                                                                 |                                                                  |              |        |        | by atrophy of hand muscles                                                                      |                                                              |                                                                                |
| Udd distal myopathy                                             | Titin                                                            | 2q31         | AR, AD | LG, DM |                                                                                                 |                                                              | Some phenotypes with early respiratory failure or early dilated cardiomyopathy |
| Markesbery-Griggs                                               | Z-band alternatively spliced PDZ motif-containing protein (ZASP) | 10q22.3-23.2 | AD     | LG, DM | Onset > 40 years, foot drop                                                                     | Myofibrillar myopathy, myotonic or pseudomyotonic discharges | Cardiomyopathy, respiratory muscle weakness                                    |
| Laing, hyaline body myopathy                                    | MYH7, myosin heavy chain                                         | 14q11        | AD     | DM     | Early adult onset, foot drop, neck weakness, disabling myalgias, calf hypertrophy               |                                                              | Cardiomyopathy                                                                 |
| Williams distal myopathy                                        | Filamin C                                                        | 7q32.1       | AD     | LG, DM | Onset > 40 years, foot drop                                                                     | Myofibrillar myopathy, myotonic or pseudomyotonic discharges | Cardiomyopathy, respiratory muscle weakness                                    |
| Vocal cord and pharyngeal weakness with distal myopathy (VCPDM) | Matrin-3                                                         | 5q31.2       | AD     | DM     | Mean age at onset 45 years, foot drop and distal upper extremity weakness, dysphagia, dysphonia | Subsarcolemmal rimmed vacuoles                               |                                                                                |

|                                                       |                                                                         |            |    |                        |                                          |                 |                                                                            |
|-------------------------------------------------------|-------------------------------------------------------------------------|------------|----|------------------------|------------------------------------------|-----------------|----------------------------------------------------------------------------|
| Distal myopathy with Kelch-like homologue 9 mutations | Kelch-like 9                                                            | 9p22       | AD | DM                     |                                          |                 |                                                                            |
| Miyoshi myopathy type I, LGMD2B                       | Dysferlin                                                               | 2p13       | AR | DM (Miyoshi phenotype) | Calf atrophy, inability to stand on toes |                 | Left ventricular hypertrophy or reduced ejection fraction in rare patients |
| Miyoshi myopathy type III, LGMD2L                     | Anoctamin-5                                                             | 11p14.3    | AR | DM (Miyoshi phenotype) | Calf atrophy, inability to stand on toes |                 |                                                                            |
| Nonaka myopathy, AR hIBM                              | Glucosamine (UDP-N-acetyl)-2-epimerase/N-acetylmannosamine kinase (GNE) |            | AR | DM                     | Early adult onset, foot drop             | Rimmed vacuoles |                                                                            |
| Nebulin myopathy                                      | Nebulin                                                                 | 2q21.2-q22 | AR | DM                     | Early adult onset, foot drop             | Nemaline rods   |                                                                            |

---

#### Other dystrophies

|                                |                  |      |    |    |                                                                |                                               |                          |
|--------------------------------|------------------|------|----|----|----------------------------------------------------------------|-----------------------------------------------|--------------------------|
| Bethlem myopathy               | Collagen VI      |      | AD | HP | Joint laxity, prominent calcanei, variable age of onset        |                                               |                          |
| Ullrich myopathy               | Collagen VI      |      | AR | HP | Joint laxity, prominent calcanei, neonatal or congenital onset |                                               |                          |
| Selenoprotein N1 (rigid spine) | Selenoprotein N1 | 1p36 | AR | LG | Rigid spine, joint contractures,                               | Multiminicores, cores, Mallory bodies, type I | Restrictive lung disease |

syndrome)\*

Muscular dystrophy with generalized lipodystrophy

Cavin-1/PTRF

17q21.2

AR

Distal dominant, generalized

generalized weakness

Generalized lipodystrophy, myalgia, cramps, percussion-induced muscle mounding, hepatosplenomegaly, insulin resistance, acanthosis nigricans

fiber predominance

Arrhythmias including prolonged QT syndrome, sudden cardiac death

Abbreviations: AD = autosomal dominant; AR = autosomal recessive; DM = distal muscular; EDMD = Emery-Dreifuss muscular dystrophy;

hIBMPFD = hIBM with Paget disease and frontotemporal dementia; HMERF = hereditary myopathy with early respiratory failure; HP =

humero-peroneal; LG = limb-girdle; PTRF = polymerase I and transcript release factor; SP = scapulo-peroneal; XR = X-linked recessive.

\*Rigid spine syndrome can also be caused by FHL1, BAG3, lamin A/C, and collagen VI mutations.

LGMD 2R and 2S were described after this systematic review was performed and hence are not discussed in this guideline.
